**ERRATUM**

In the February 1998 issue (volume 88, number 2), there was an article authored by C. P. King and C. C. Hug, Jr., beginning on page 519. On page 523, "The rate of return on the initial research investment by ASA and FAER is 174:1 for . . ." *SHOULD READ* "The rate of return on the initial research investment by ASA and FAER is 17.4:1 . . ." (as it reads correctly on page 521).
